# Supplementary material for: Low-cost and flexible ultra-thin silicon solar cell implemented with energy-down-shift via Cd0.5Zn0.5S/ZnS core/shell quantum dots
Source: Royal Society of Chemistry journal article supplement (doi:10.1039/c4ta05004e), 2014-11-10
Supplement: c4ta05004e1.pdf [file c4ta05004e1.pdf]

## SUPPLEMENTARY TABLE & FIGURES

**Supplementary Table 1.** Material properties of CdS, ZnS, and calculated Cd<sub>0.5</sub>Zn<sub>0.5</sub>S<sup>1, 2</sup>

| Material                 | CdS                                                                                                                                          | Calculated Cd <sub>0.5</sub> Zn <sub>0.5</sub> S | ZnS         |
|--------------------------|----------------------------------------------------------------------------------------------------------------------------------------------|--------------------------------------------------|-------------|
| Crystal structure        | wurtzite                                                                                                                                     | hexagonal                                        | wurtzite    |
| Lattice constant (a / c) | 4.14 / 6.71                                                                                                                                  | 3.98 / 6.485                                     | 3.82 / 6.26 |
| Band gap                 | 2.37 eV                                                                                                                                      | 2.85 eV                                          | 3.56 eV     |
| Interfacial strain       | $\frac{3.82 - 3.98}{3.98} \times 100\% = -4.02\%$ <i>at the interface between Cd<sub>0.5</sub>Zn<sub>0.5</sub>S core QD and ZnS shell QD</i> |                                                  |             |

The emitted 442-nm wavelength blue light would be produced via the exciton recombination process at the Cd<sub>0.5</sub>Zn<sub>0.5</sub>S core QD and the red shift induced by the compressive strain at the interface between the Cd<sub>0.5</sub>Zn<sub>0.5</sub>S core QD and ZnS shell QD. In order to understand this, we estimated the interfacial strain depending on core QD and shell QD materials. The interfacial strain of Cd<sub>0.5</sub>Zn<sub>0.5</sub>S/ZnS core/shell QD was calculated by using the references presenting the lattice constants of the Cd<sub>0.5</sub>Zn<sub>0.5</sub>S core and ZnS shell QD, indicating a compressive strain of ~ 4.02%, as shown in Table 1. In addition, the energy band-gap of the Cd<sub>0.5</sub>Zn<sub>0.5</sub>S core QD was calculated by using the Vegard's law, given by<sup>3, 4</sup>

$$\alpha_{Cd_xZn_{1-x}S} = x\alpha_{CdS} + (1-x)\alpha_{ZnS}$$

$$E_{g,Cd_xZn_{1-x}S} = xE_{g,CdS} + (1-x)E_{g,ZnS} - bx(1-x)$$

where  $\alpha_{Cd_xZn_{1-x}S}$ ,  $\alpha_{CdS}$ ,  $\alpha_{ZnS}$  are the lattice parameters of Cd<sub>x</sub>Zn<sub>1-x</sub>S, CdS, ZnS and  $E_{g,Cd_xZn_{1-x}S}$ ,  $E_{g,CdS}$ ,  $E_{g,ZnS}$  are band gap of Cd<sub>x</sub>Zn<sub>1-x</sub>S, CdS, ZnS and  $b$  is the band gap bowing parameter of the Cd<sub>x</sub>Zn<sub>1-x</sub>S. The calculated band gap of the Cd<sub>0.5</sub>Zn<sub>0.5</sub>S core QD is 2.85 eV at 0.45 eV of band gap bowing parameter, which will emits a PL peak at 435-nm in wavelength.<sup>1</sup> However, the measured

PL (emitted blue light) of the  $\text{Cd}_{0.5}\text{Zn}_{0.5}\text{S}/\text{ZnS}$  core/shell QD peaked at 442-nm in wavelength, corresponding to  $\sim 2.81\text{eV}$ . This wavelength difference (a red shift of  $\sim 7\text{nm}$ ) would be originated from the interfacial compressive strain. Therefore, the 442-nm wavelength blue light was emitted by the red shift induced by the interfacial compressive strain from the electron-hole recombination at the energy band gap of the  $\text{Cd}_{0.5}\text{Zn}_{0.5}\text{S}$  core QD (2.85 eV).

1. O. E. Jaime-Acuña, H. Villavicencio, J. A. Díaz-Hernández, V. Petranovskii, M. Herrera and O. Raymond-Herrera, *Chemistry of Materials*, 2014.
2. D. Strauch, in *New Data and Updates for several III-V (including mixed crystals) and II-VI Compounds*, ed. U. Rössler, Springer Berlin Heidelberg, 2012, vol. 44E, ch. 65, pp. 99-102.
3. Y.-K. Kuo, B.-T. Liou, S.-H. Yen and H.-Y. Chu, *Optics Communications*, 2004, **237**, 363-369.
4. L. Vegard, *Z. Physik*, 1921, **5**, 17-26.

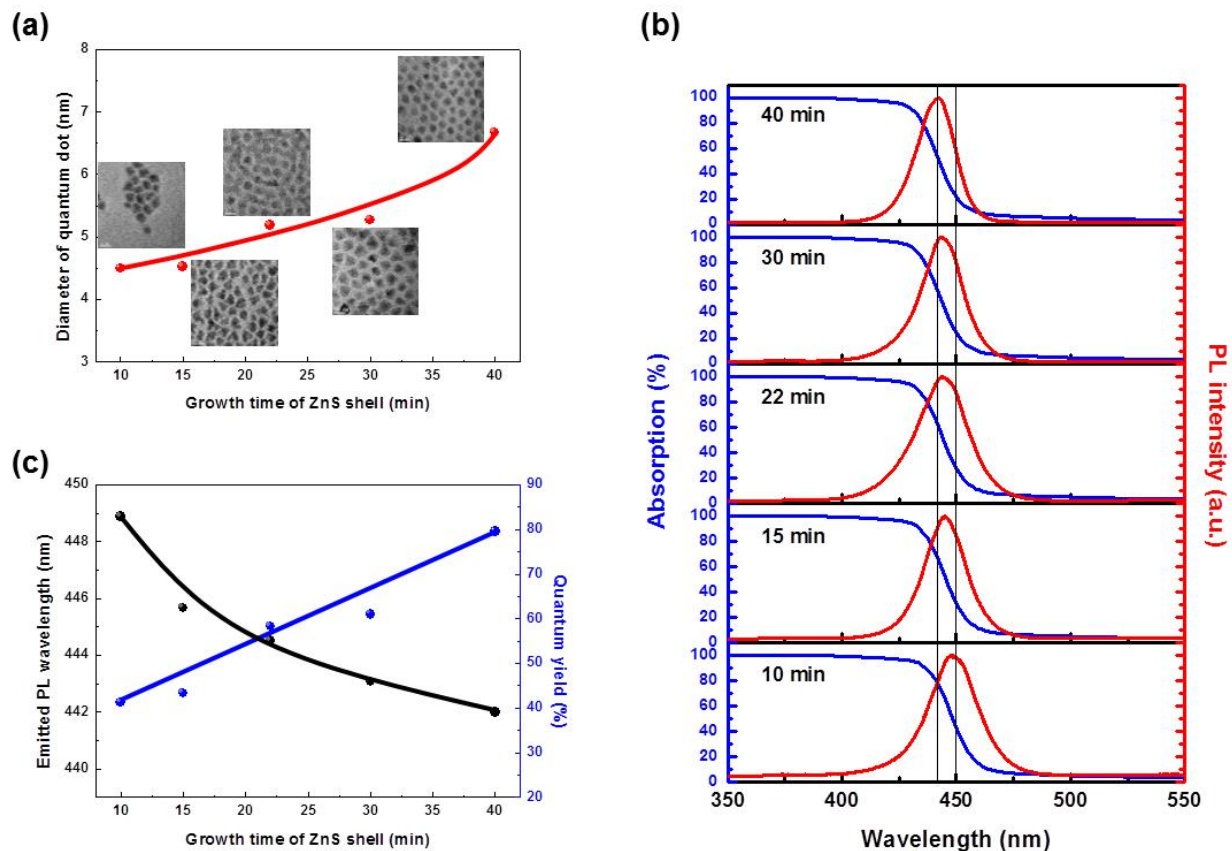

**Supplementary Figure 1.** Dependency of optical properties on the growth time of the ZnS shell in  $\text{Cd}_{1-x}\text{Zn}_x\text{S}/\text{ZnS}$  core/shell QDs. (a) Diameter of  $\text{Cd}_{1-x}\text{Zn}_x\text{S}/\text{ZnS}$  core/shell QDs calculated by observing TEM images, (b) Absorption spectrums and PL peaks, and (c) Emitted PL wavelength and quantum yield.

(a)

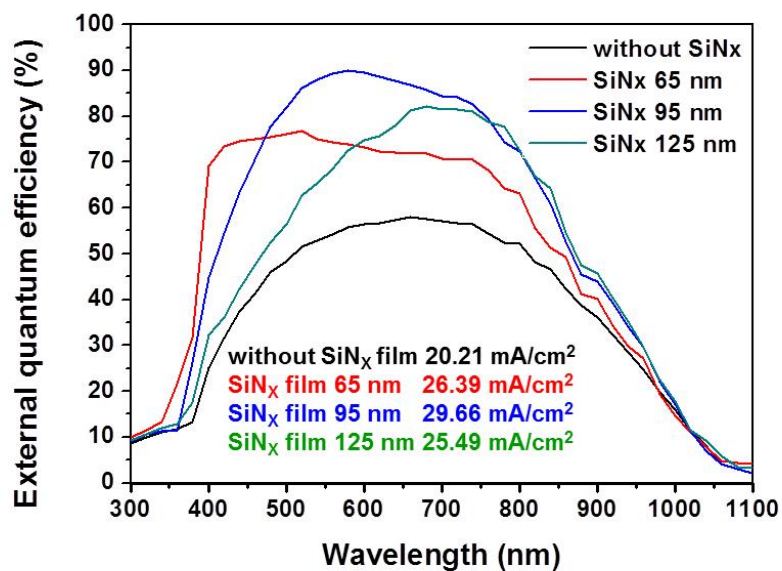

(b)

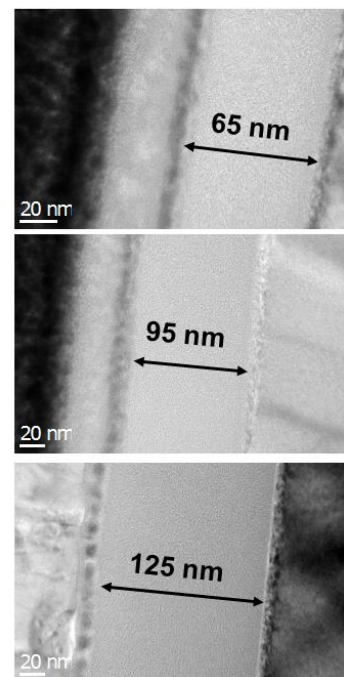

**Supplementary Figure 2.** Effect of the SiN<sub>x</sub> anti-reflective film thickness on EQE and  $J_{SC}$ . (a) EQE as a function of wavelength and (b) TEM images as a function of the SiN<sub>x</sub> anti-reflective film thickness.

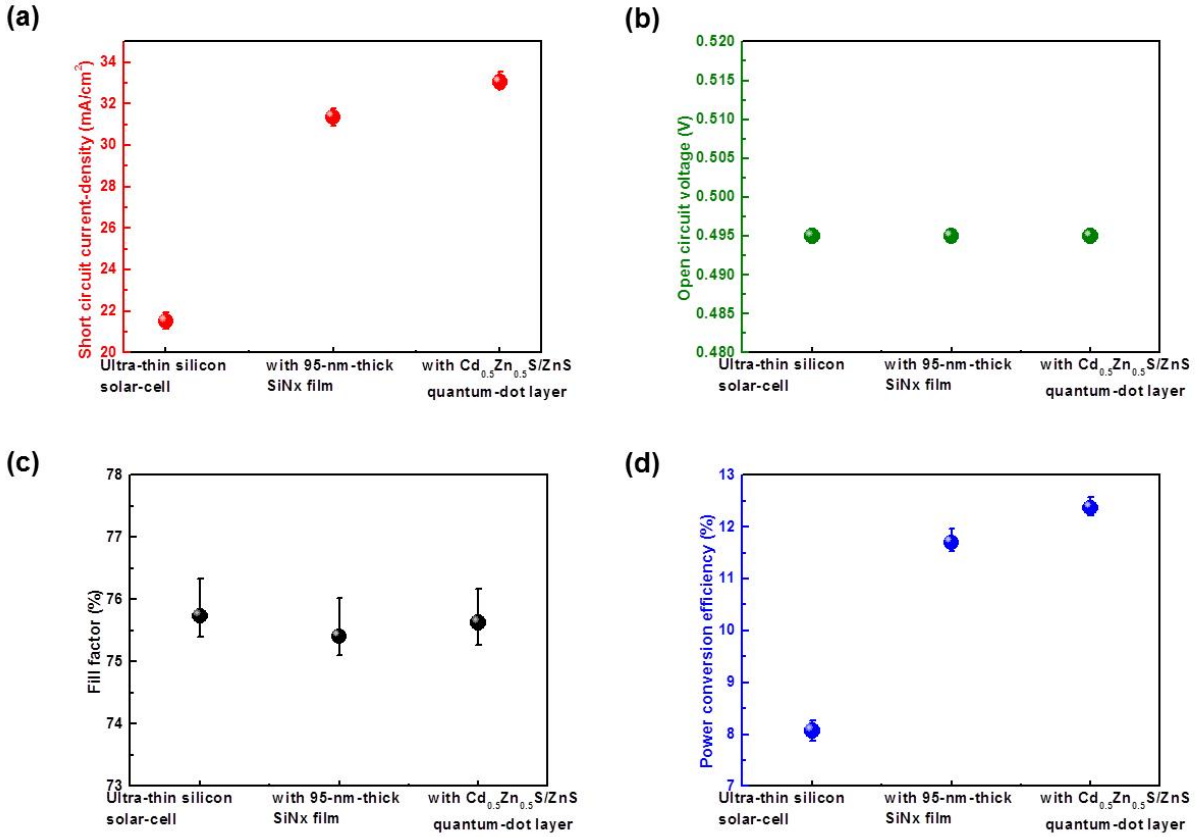

**Supplementary Figure 3.** Photovoltaic performance for the flexible ultra-thin silicon solar-cells, flexible ultra-thin silicon solar-cells with  $\text{SiN}_x$  anti-reflective film, and flexible ultra-thin silicon solar-cells with  $\text{SiN}_x$  reflectvie film and  $\text{Cd}_{0.5}\text{Zn}_{0.5}\text{S}/\text{ZnS}$  core/shell QDs. (a)  $J_{\text{SC}}$ , (b)  $V_{\text{OC}}$ , (c) FF, and (d) PCE by the average (point), maximum (higher bar) and minimum (lower bar) among six samples

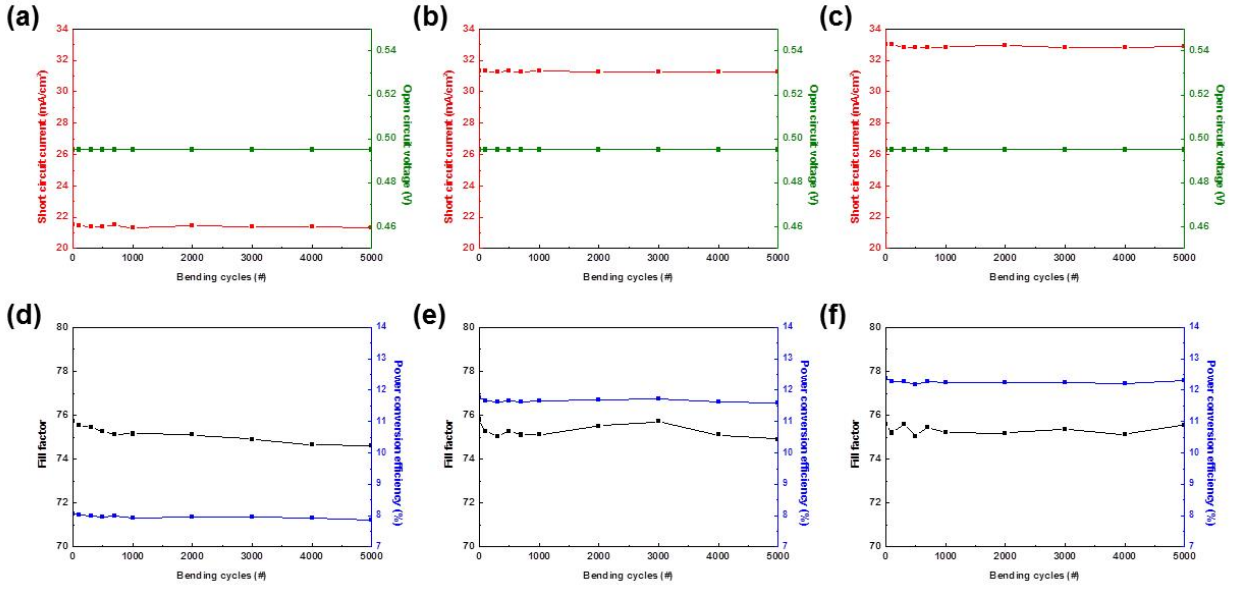

**Supplementary Figure 4.** Bending fatigue performance for flexible ultra-thin silicon solar-cells, flexible ultra-thin silicon solar-cells with SiN<sub>x</sub> anti-reflective film, and flexible ultra-thin silicon solar-cells with SiN<sub>x</sub> anti-reflective film and Cd<sub>0.5</sub>Zn<sub>0.5</sub>S/ZnS core/shell QDs. (a), (b) and (c) J<sub>SC</sub> and V<sub>OC</sub>, (d),(e), and (f) FF and PCE as a function of bending cycles.
